# Supplementary material for: Surveillance of Individuals with a Family History of Pancreatic Cancer and Inherited Cancer Syndromes: A Strategy for Detecting Early Pancreatic Cancers
Source: Diagnostics (Basel). 2019 Oct 31;9(4):169. doi: 10.3390/diagnostics9040169 (PMC6963266; doi:10.3390/diagnostics9040169)
Supplement: Supplementary file 1 [file diagnostics-09-00169-s001.xlsx]

## Sheet: Table 1
Table 1. Pancreatic cancer risk in individuals with hereditary cancer syndromes
Hereditary cancer syndrome	Genes	Relative risk	Cumulative risk
Peutz-Jeghers syndrome (PJS) 11	STK11	132	11~36%
Hereditary pancreatitis (HP) 12	PRSS1	53~87	40~55%
Familial atypical multiple mole melanoma (FAMMM) 13, 14	CDKN2A/p16	13~22	0.17
Hereditary breast-ovarian cancer syndrome (HBOC) 15,16	BRCA1, BRCA2	4~13	2~7%
Lynch syndrome (LS) 17,18	MLH1, MSH2, MSH6, PMS2	5~9	0.04
Familial adenomatous polyposis (FAP) 19	APC	5	ー

## Sheet: Table 2
Table 2. Individuals for the pancreatic cancer screening#
* Individuals with ≥3 affected relatives, with ≥1 affected FDR
* Individuals with ≥2 affected FDRs with PC, with ≥1 affected FDR
* Individuals with ≥2 affected relatives with PC, with ≥l affected FDR
* Peutz-Jeghers syndrome patients, regardless of family history of PC
* Mutation carriers of CDKN2A, BRCA, PALB2 or mismatch repair genes with 1 affected FDR
* BRCA2 mutation carriers with 2 affected family member of PC
FDR: first-degree relative, PC: pancreatic cancer.
#Reported in the International Cancer of Pancreas Screening (CAPS) Consortium (2011)

## Sheet: Table 3
Table 3. Outcome of pancreatic cancer surveillance for high risk individuals (Summary of the previous studies)♮
Author	Reference no.	Year	n	Screened individuals		Image modality		Screening period (months)	Ratio of surgical resection (n)	Resected pancreatic lesion : n			Incidence of unresectable PC patients (n)
				Age (y.o)	Conditions	Screening	Further examination			Benign*	Border/CIS♩	PC
Brentnall	75	1999	14	41	FPC kindred	EUS, CT	ERCP	15	50.0% (7)	0	7$	0	0% (0)
Canto	80	2004	38	58	FPC kindred, PJS	EUS	CT, EUS-FNA, ERCP	22	18.4% (7)	4	2	1	0% (0)
Canto	73	2006	78	52	FPC kindred, PJS	EUS, CT	EUS-FNA, ERCP	12	9.0% (7)	4	3	0	1.3% (1)
Langer	31	2009	76	60	FPC kindred, BRCA2 (+)#, CDKN2A (+) FAMMM family	EUS, MRI	EUS-FNA, ERCP	NA	9.2% (7)§	6	0	0	0% (0)
Poley	104	2009	44	50	FPC kindred, HP, PJS FAMMM, BRCA1/2 (+), TP53 (+)	EUS	CT, MRI	initial¶	6.8% (3)	0	0	3	0% (0)
Verna	105	2010	51	52	FPC kindred, BRCA1/2 (+) LS, FAMMM	EUS, MRI	EUS-FNA, ERCP	initial	9.8% (5)	4	0	1	2.0% (1)
Ludwig	106	2011	109	54	FPC kindred, BRCA1/2(+)	MRI	EUS, EUS-FNA	initial	5.5% (6)	3	2	1	0% (0)
Vasen	107	2011	79	56	CDKN2A/p16-Leiden (+)	MRI	MRI	48	6.3% (5)	0	0	5	2.5% (2)♭
Al-Sukhni	108	2012	262	54	FPC kindred, PJS, HP, CDKN2A (+), BRCA1/2 (+)	MRI	EUS, EUS-FNA, ERCP	50	1.5% (4)	3	0	1	0.8% (2)
Sud	65	2014	16	51	FPC kindred, HP, CDKN2A (+), BRCA1/2 (+), PJS, LS	EUS	EUS-FNA	NA	18.8% (3)	1	0	2	0% (0)
Del Chiaro	109	2015	40	50	FPC kindred, individuals with increased genetic risk	MRI	EUS, EUS-FNA	13	12.5% (5)	2	0	3	0% (0)
Vasen	110	2016	411	46~56	FPC kindred, CDKN2A (+), BRCA1/2 (+), PALB2 (+)	MRI ± EUS	EUS, CT , EUS-FNA	16~53	7.3% (30)	15	4	11	1.0% (4)♭
Canto	77	2018	354	56	FPC kindred, PJS, BRCA1/2(+) PALB2, PRSS1, CDKN2A(+), mismatch repair genes(+)	EUS , MRI, CT	EUS-FNA	67	12.4% (44)	20	10	14	1.1% (4)⌘
*benign lesions included low-moderate grade of intraductal papillary mucinous neoplasm (IPMN), grade 1~2 of pancreatic intraepithelial neoplasm (PanIN), serous cystadenoma, and neuroendocrine tumor, ♩high-grade precursors and PanIN3, §no lesion detected in one case of resected pancreas, #(+): mutation carrier, $wide spread dysplasia, ¶evaluated only by the initial surveillance, one resectable pan…
